# Supplementary material for: An unconventional gatekeeper mutation sensitizes inositol hexakisphosphate kinases to an allosteric inhibitor
Source: eLife journal article supplement (doi:10.7554/elife.88982), 2023-06-23
Supplement: figures [file elife-88982-figures-v2.pdf]

---

## Figures and figure supplements

An unconventional gatekeeper mutation sensitizes inositol hexakisphosphate kinases to an allosteric inhibitor

**Tim Aguirre *et al.***

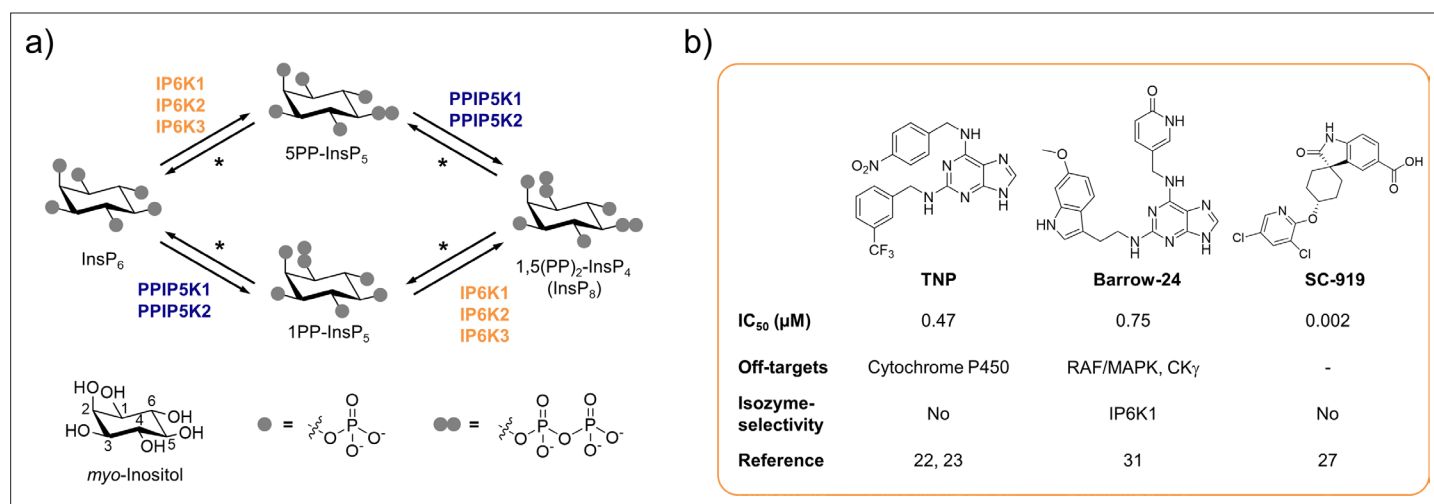

**Figure 1.** The inositol pyrophosphate pathway is a therapeutically relevant target for small molecule inhibitors. **(a)** Simplified inositol pyrophosphate metabolism with a focus on kinases. PPIP5K: inositol hexakisphosphate and diphosphoinositol-pentakisphosphate kinase. \*PP-InsP dephosphorylation is catalyzed by nudix hydrolases DIPP1/2α/2β/3 (Lonetti et al., 2011; Hua et al., 2003; Saiardi et al., 2000). **(b)** Chemical structures and properties of selected IP6K inhibitors: widely used TNP, isozyme-selective Barrow-24, and potent inhibitor SC-919.

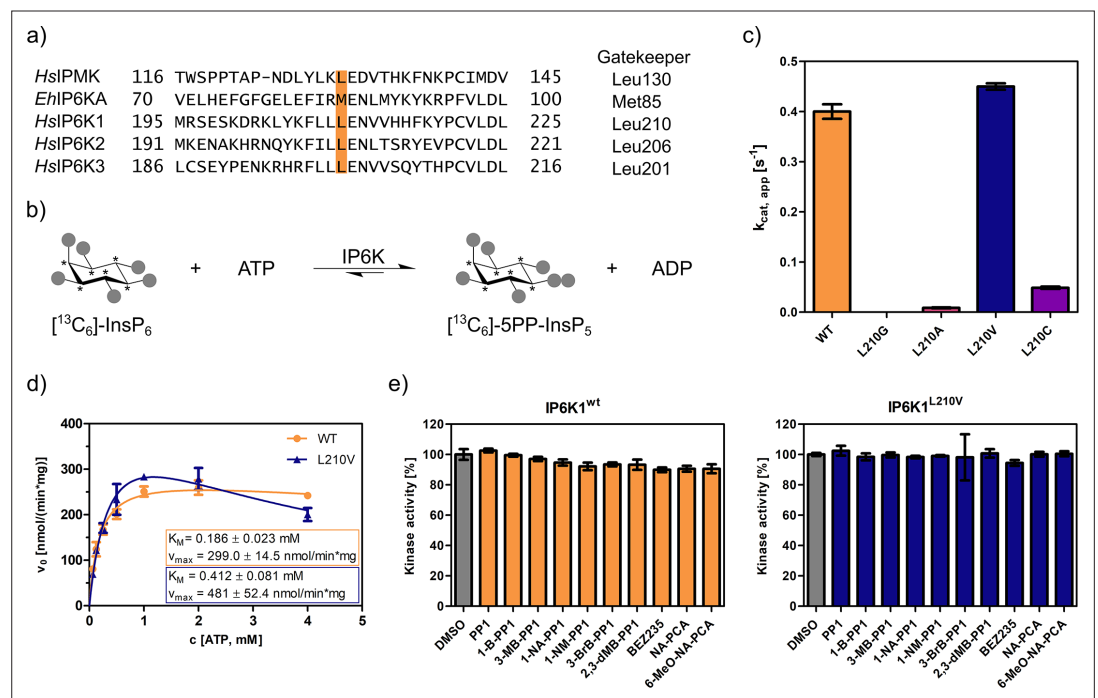

**Figure 2.** An unusual valine gatekeeper mutant retains catalytic activity. **(a)** Sequence alignment of InsP kinases to identify the gatekeeper position of human inositol hexakisphosphate kinases (IP6Ks). The gatekeeper residue is highlighted in orange. **(b)** Kinase reaction of IP6Ks using uniformly  $^{13}\text{C}$ -labeled  $\text{InsP}_6$  as substrate. Asterisks indicate  $^{13}\text{C}$ -labeled positions. The conversion to 5PP- $\text{InsP}_5$  was followed by an established spin-echo difference NMR method (Harmel et al., 2019; Riemer et al., 2021). **(c)** Catalytic activity of IP6K gatekeeper mutants indicated by apparent turnover numbers  $k_{\text{cat, app}}$ . **(d)** Michaelis–Menten graphs for IP6K1<sup>wt</sup> and IP6K1<sup>L210V</sup>. **(e)** Screening of established analog-sensitive kinase inhibitors (Figure 2—figure supplement 4) at 10  $\mu\text{M}$  concentration against IP6K1<sup>wt</sup> and IP6K1<sup>L210V</sup> using the NMR assay. All data points were measured in independent triplicates and error bars represent the standard deviation.

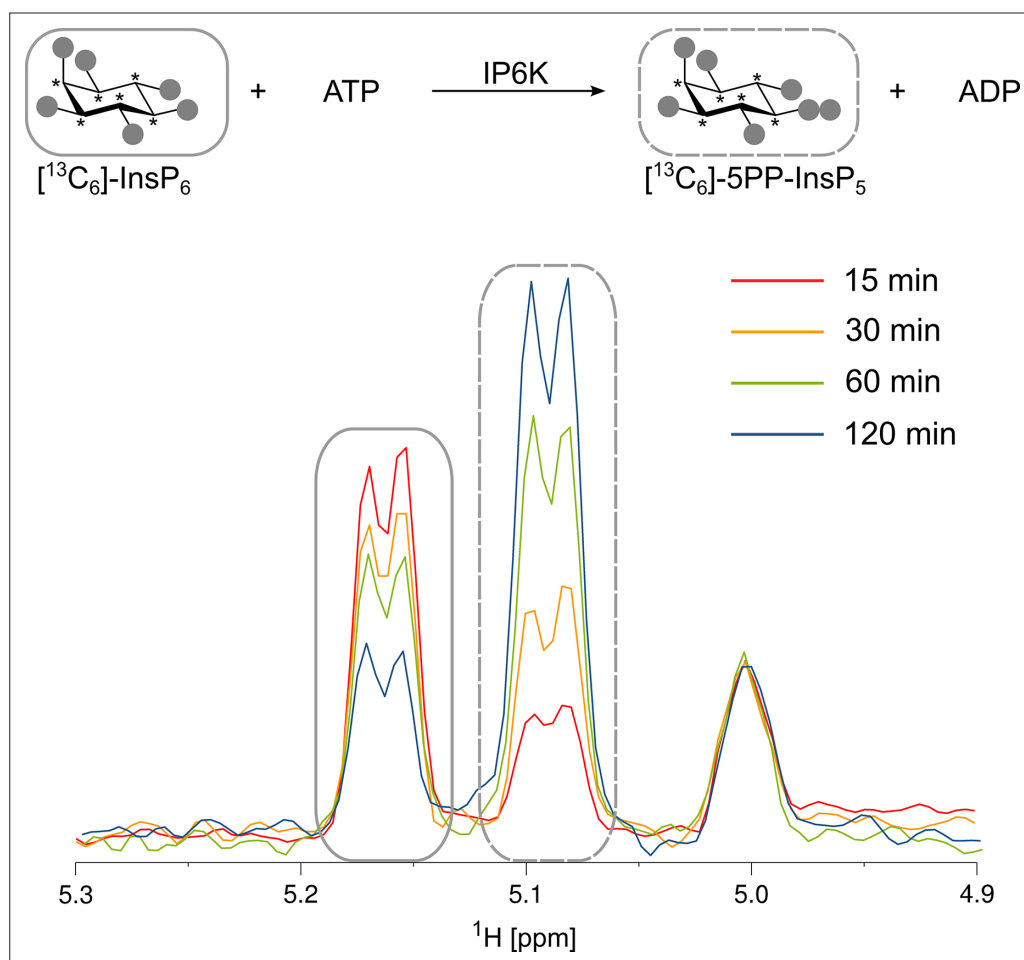

**Figure 2—figure supplement 1.** Kinase reaction of inositol hexakisphosphate kinases (IP6Ks) using fully  $^{13}\text{C}$ -labeled  $\text{InsP}_6$  as a substrate. The conversion to 5PP- $\text{InsP}_5$  was followed by the established spin-echo difference NMR method (Harmel et al., 2019). The peaks corresponding to substrate and product are framed with solid or dashed rectangles, respectively. Asterisks indicate  $^{13}\text{C}$ -labeled positions.

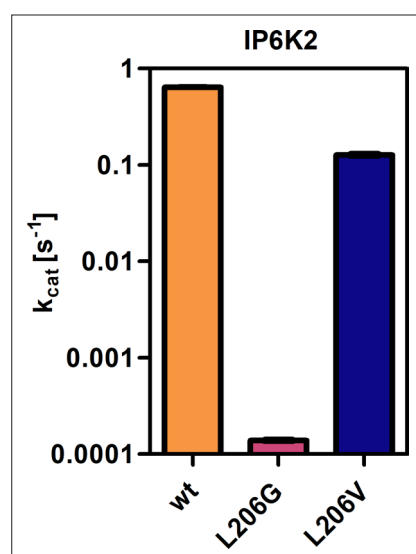

**Figure 2—figure supplement 2.** Catalytic activities of IP6K2 wild-type (WT) and gatekeeper mutants as indicated by the apparent turnover number. All samples were measured in independent triplicates and error bars represent standard deviation.

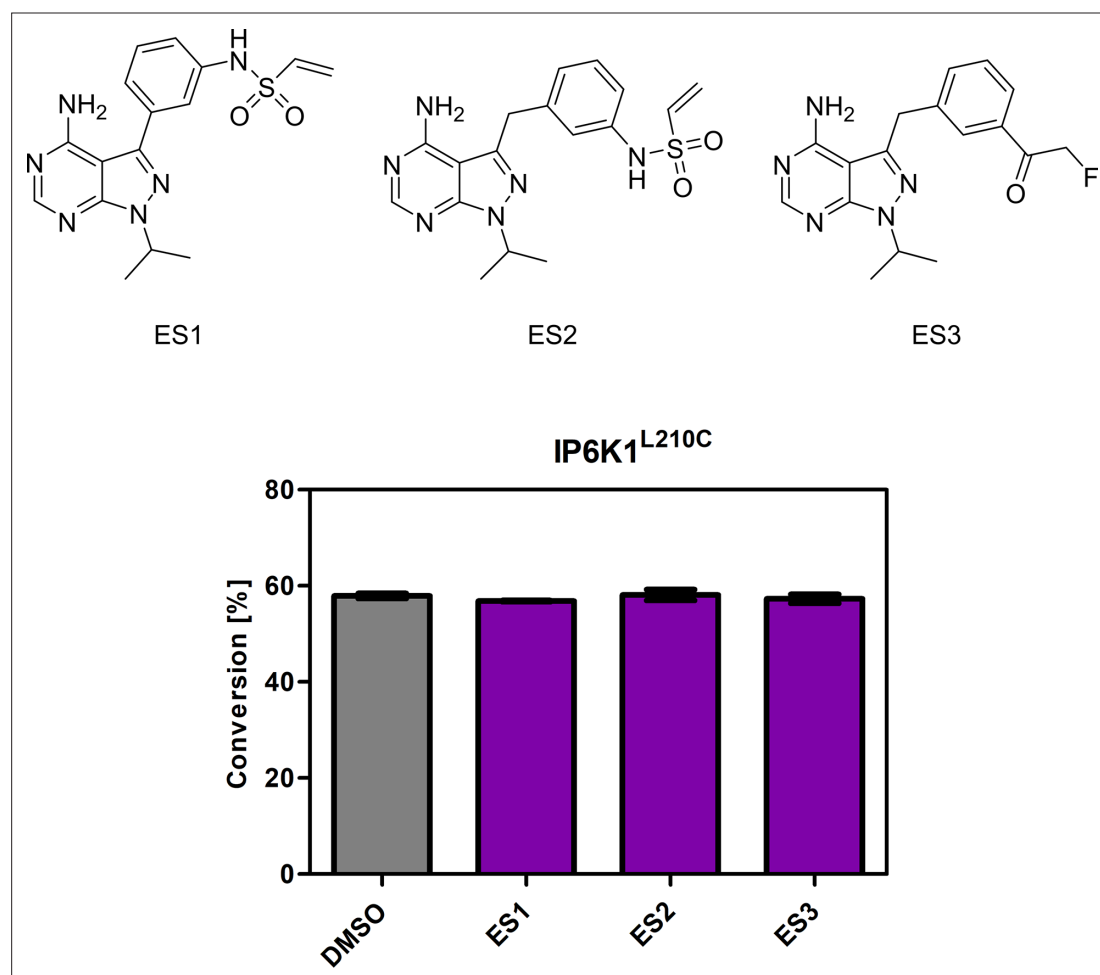

**Figure 2—figure supplement 3.** Screening of established electrophile-sensitive kinase inhibitors at 10  $\mu$ M concentration against IP6K1<sup>L210C</sup> using the NMR assay. All compounds were measured in independent triplicates and error bars represent standard deviation.

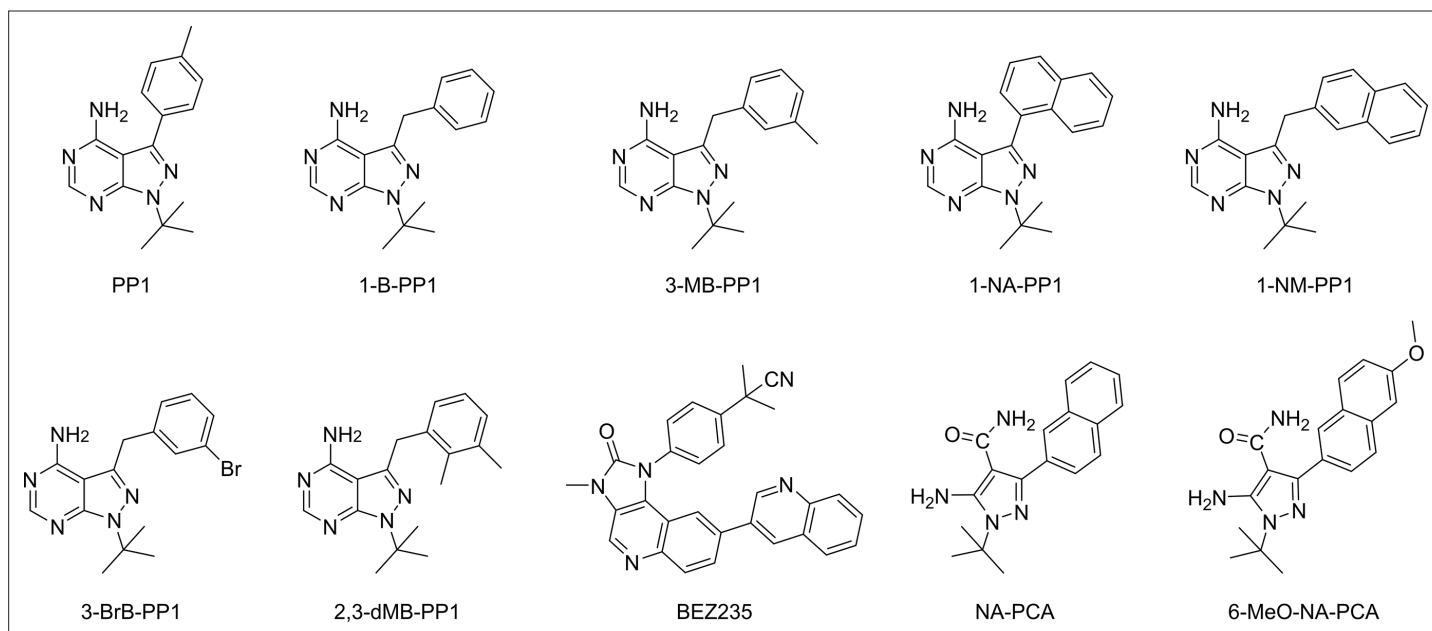

**Figure 2—figure supplement 4.** Chemical structures of established analog-sensitive kinase inhibitors screened against IP6K1<sup>L210V</sup>.

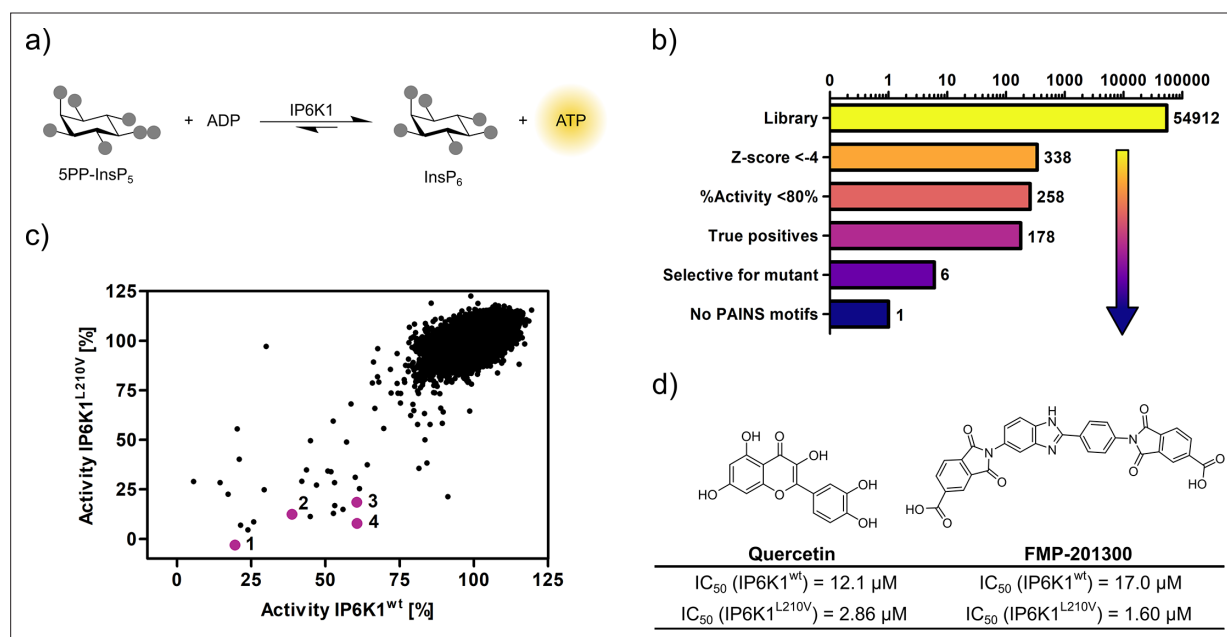

**Figure 3.** High-throughput screening provides gatekeeper mutant-selective hit compound. **(a)** ATP synthase reaction used for the high-throughput screen. The generation of ATP was monitored using a luminescence-based Kinase-Glo assay. **(b)** Reduction of putative hits by applying specific thresholds and manual selection. **(c)** Scatter plot comparing the potency of compounds measured in the primary screen against IP6K1<sup>wt</sup> and IP6K1<sup>L210V</sup>. Hits highlighted in magenta represent known IP6K inhibitors, or promising hits. 1: 6-hydroxy-DL-DOPA, 2: FMP-201300, 3: myricetin, 4: quercetin. **(d)** Examples of true positive hits that display selectivity for IP6K1<sup>L210V</sup>, including known IP6K inhibitor quercetin and newly discovered FMP-201300.

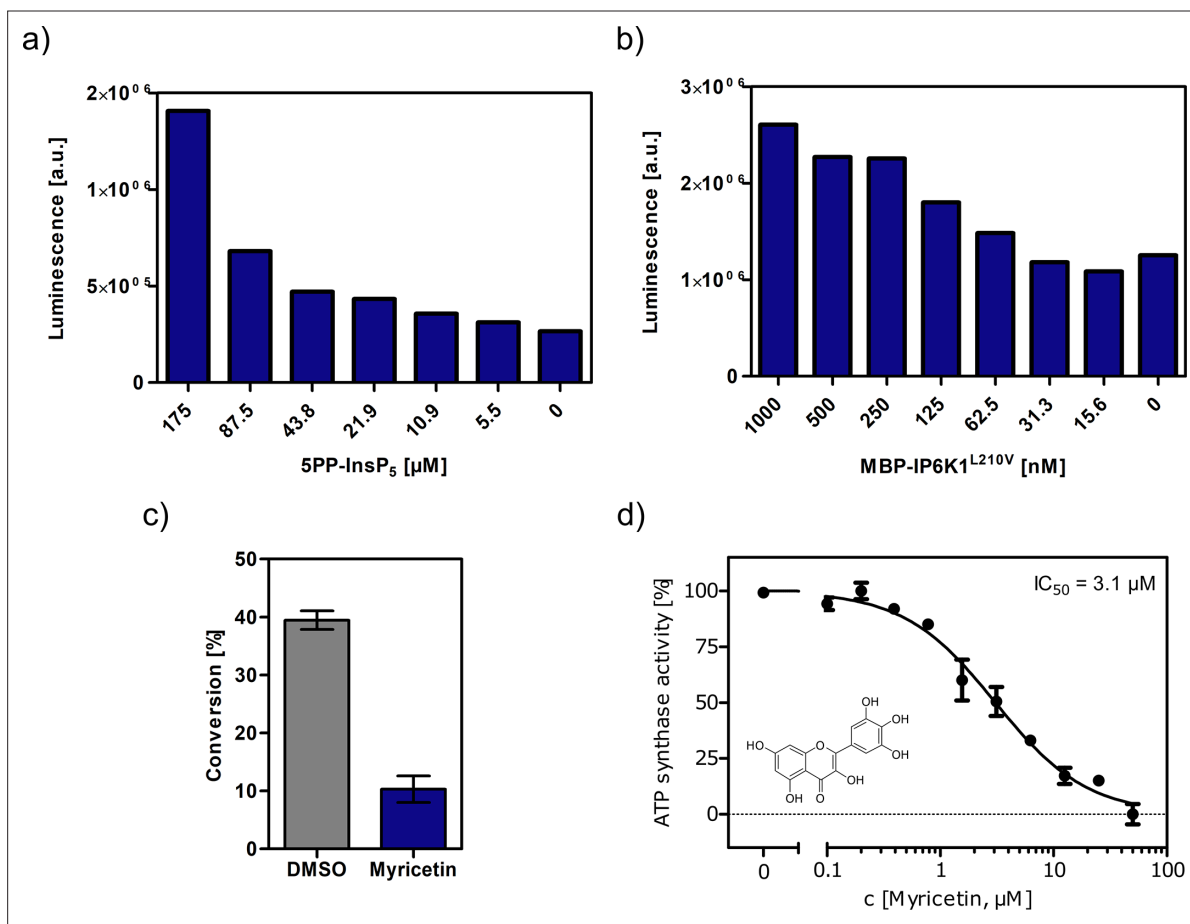

**Figure 3—figure supplement 1.** Optimization of assay conditions for high-throughput screening. **(a, b)** Serial dilution of substrate and protein in single measurements to determine suitable concentrations for the high-throughput screen using the Kinase-Glo assay. **(c)** Substrate conversion at optimized reaction conditions measured by NMR. 10 μM myricetin was used as positive control. **(d)** IC<sub>50</sub> curve of myricetin against IP6K1<sup>L210V</sup> in reverse reaction measured by NMR. All concentrations were measured in independent triplicates and error bars represent standard deviation.

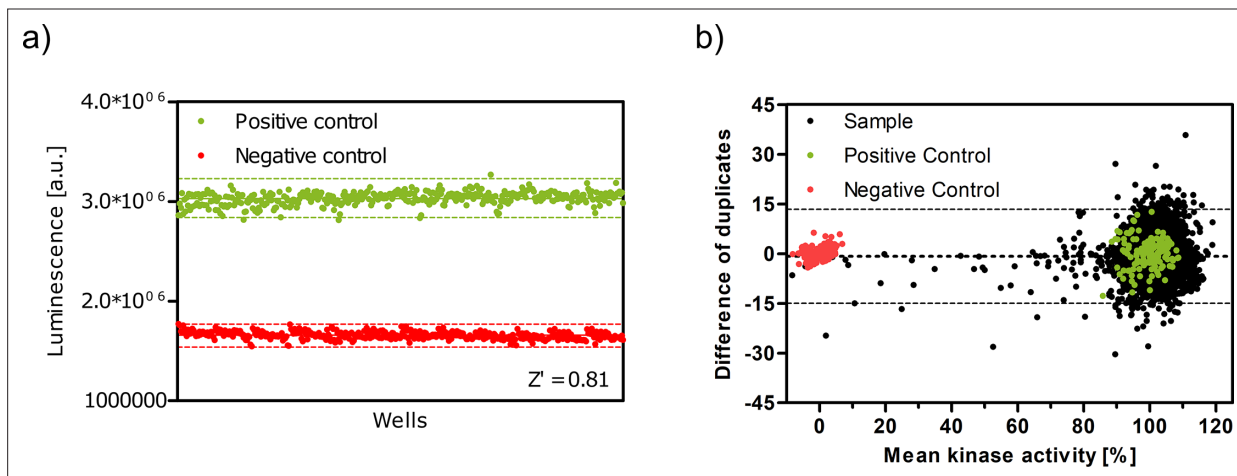

**Figure 3—figure supplement 2.** Z' plate measurement and Bland-Altman plot indicate high assay quality. (a) Z'-plate with positive and negative controls to assess the assay quality and high-throughput screen viability. Dashed lines indicate the  $\pm 3$  standard deviation values. (b) Bland-Altman plot of pilot screen. The dotted line indicates the mean of the differences and dashed lines represent the limits of agreement ( $\pm 14.2\%$ ).

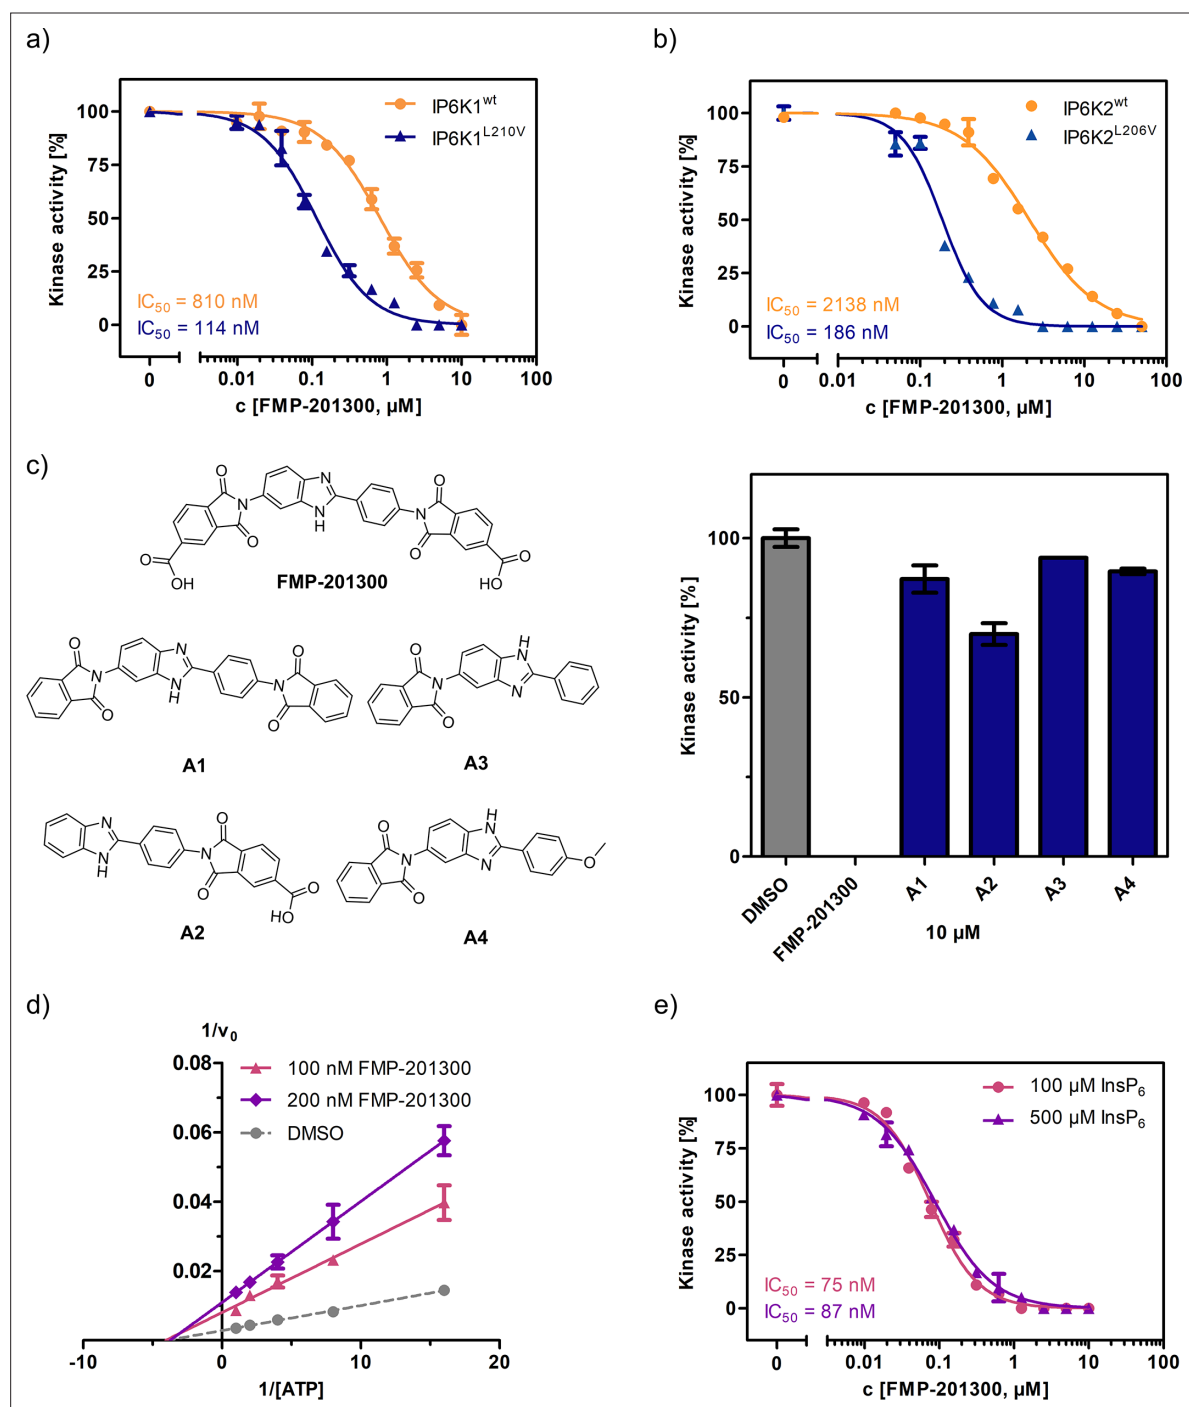

**Figure 4.** FMP-201300 appears to have very specific interactions with the kinase. **(a)** IC<sub>50</sub> curves of FMP-201300 against IP6K1<sup>wt</sup> and IP6K1<sup>L210V</sup>. **(b)** IC<sub>50</sub> curves of FMP-201300 against IP6K2<sup>wt</sup> and IP6K2<sup>L206V</sup>. 100% activity corresponds to the DMSO control and 0% indicates no substrate conversion. **(c)** Structures of FMP-201300 analogs and their inhibitory activities against IP6K1<sup>L210V</sup> at 10 μM concentration. **(d)** Lineweaver-Burk plot of FMP-201300 against IP6K1<sup>L210V</sup> at two different inhibitor concentrations. The plotted lines for the DMSO control and two different inhibitor concentrations intersect almost precisely on the x-axis, indicating no change in  $K_M$  value and a decrease in  $v_{max}$  upon inhibition. **(e)** IC<sub>50</sub> curves of FMP-201300 against IP6K1<sup>L210V</sup> at two different InsP<sub>6</sub> concentrations. All data points were measured in independent triplicates and error bars represent the standard deviation.

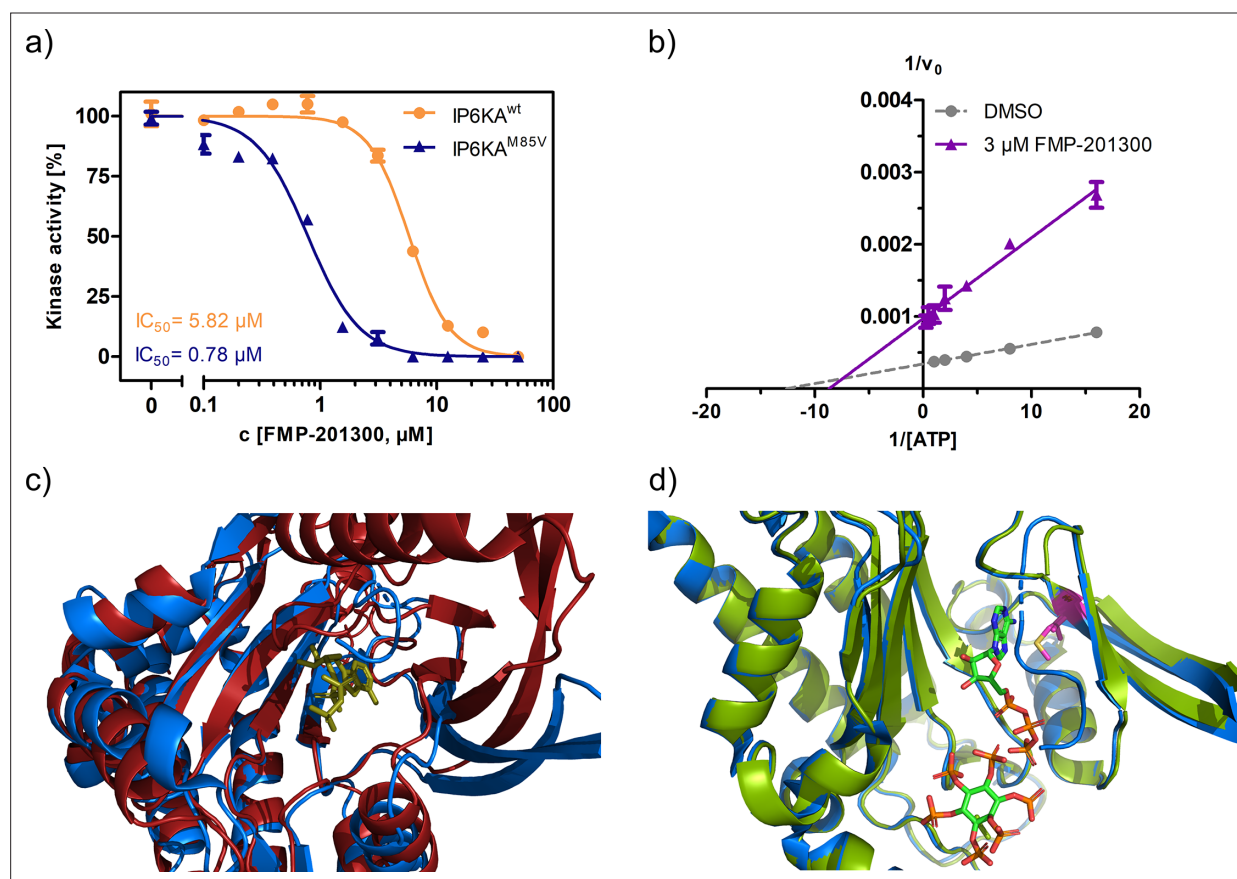

**Figure 4—figure supplement 1.** Characterization of the interaction between FMP-201300 and EhIP6KA. **(a)** IC<sub>50</sub> curves of FMP-201300 against IP6KA<sup>wt</sup> and IP6KA<sup>M85V</sup>. **(b)** Lineweaver-Burk plot of FMP-201300 against IP6KA<sup>wt</sup>. All points were measured in independent triplicates and error bars represent standard deviation. **(c)** Zoom-in on the structural alignment of EhIP6KA (blue) bound to ATP (olive) (PDB: 4O4F) and the AlphaFold structure model of IP6K1 (red) (Q92551) (Jumper et al., 2021). **(d)** Zoom-in on the structural alignment of published EhIP6KA<sup>wt</sup> crystal structure bound to ATP and InsP<sub>6</sub> (blue, PDB: 4O4F), and IP6KA<sup>M85V</sup> crystal structure (green, this study, PDB: 8OMI, bound ATP omitted for clarity). The gatekeeper residue is highlighted in magenta.

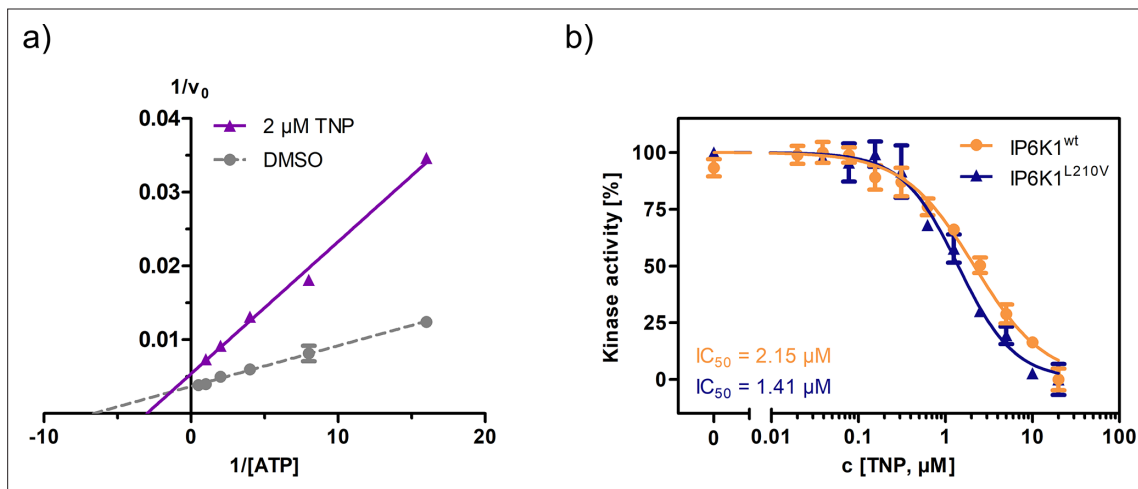

**Figure 4—figure supplement 2.** Established pan-IP6K inhibitor TNP displays ATP-competitive mechanism and no selectivity towards the valine gatekeeper mutant. (a) Lineweaver–Burk plot of TNP against IP6K1<sup>wt</sup>. (b)  $IC_{50}$  curves of TNP against IP6K1<sup>wt</sup> and IP6K1<sup>L210V</sup>. All points were measured in independent triplicates and error bars represent standard deviation.

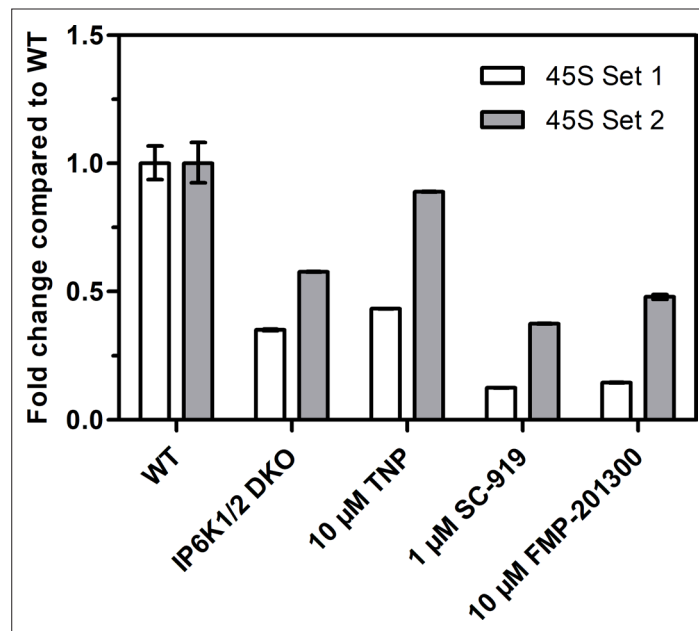

**Figure 4—figure supplement 3.** Reverse transcription quantitative PCR analysis to measure 45S pre-rRNA transcript levels using two different primer sets. Values indicate the fold change in transcript levels in IP6K1/2 double knockout (DKO) cells, or TNP-, SC-919-, or FMP-201300-treated HCT116 cells compared to HCT116 WT cells. The fold change was calculated using the  $\Delta\Delta C_t$  method and independent technical triplicates.

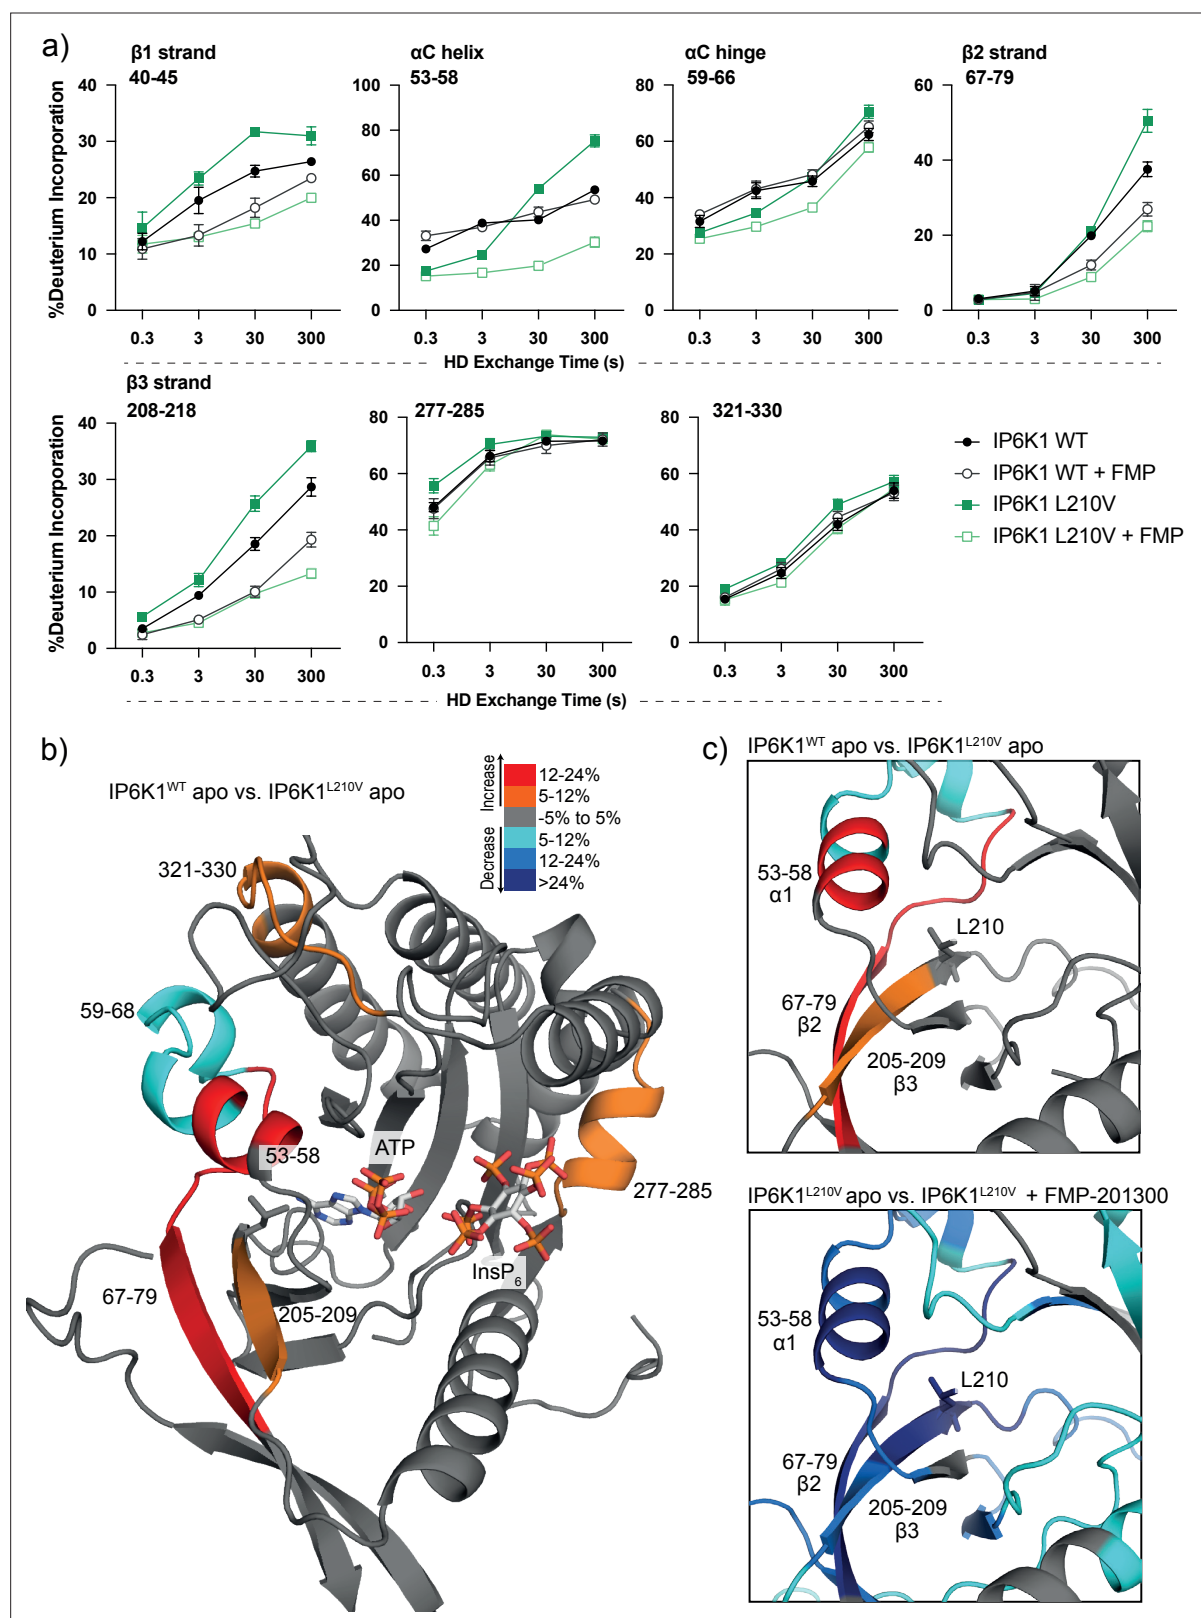

**Figure 5.** Hydrogen deuterium exchange mass spectrometry (HDX-MS) reveals increased flexibility in the  $\beta 2$ – $\beta 3$  strands and  $\alpha C$  helix induced by the IP6K1<sup>L210V</sup> mutation that sensitizes the enzyme to FMP-201300. **(a)** HDX differences in IP6K1. Time course of deuterium incorporation for a selection of peptides. Raw data can be found in the **Supplementary file 1**. **(b)** Overall HDX-MS changes in deuterium incorporation induced by the IP6K1<sup>L210V</sup> mutation. Differences in deuterium exchange rates mapped on a model of IP6K1<sup>WT</sup> (AlphaFold structure prediction Q92551 with ATP and InsP<sub>6</sub> from

Figure 5 continued on next page

*Figure 5 continued*

EhIP6KA docked in the active site (PDB: 4O4F)). Peptides that showed significant differences in HDX and met the cut-offs were included (>6% deuterium incorporation and 0.5 Da with an unpaired Student's *t*-test of  $p < 0.05$ ). Strongly disordered regions and regions of low per-residue confidence scores (pLDDT) were omitted for clarity. (c) A magnified view of gatekeeper region included the  $\beta 2$ – $\beta 3$  strands and  $\alpha C$  helix. The same regions that show increased flexibility in the IP6K1<sup>L210V</sup> mutant (top panel) also undergo large decreases in exchange upon binding to FMP-201300 (bottom panel). This increased flexibility likely allows accommodation of the inhibitor and ATP.

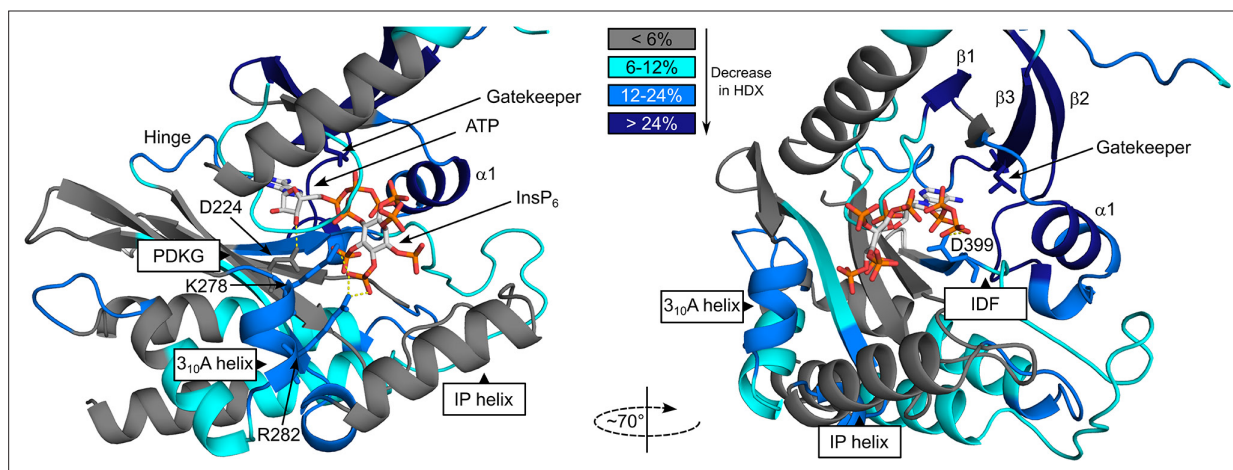

**Figure 5—figure supplement 1.** Hydrogen deuterium exchange mass spectrometry (HDX-MS) shows FMP-201300 binding to IP6K1<sup>L210V</sup> leads to decreases that correspond to an allosteric mechanism of action. Differences in deuterium exchange rates mapped on a model of IP6K1<sup>wt</sup> (AlphaFold structure prediction Q92551 with ATP and InsP<sub>6</sub> from *Eh*IP6KA docked in the active site (PDB: 4O4F)). Peptides that showed significant differences in HDX and met the cut-offs were included (>6% deuterium incorporation and 0.5 Da with an unpaired Student's *t*-test of *p* < 0.05). Differences in deuterium incorporation >6%, >12%, and >24% compared to the apo enzyme are colored in teal, blue, and navy, respectively. Gray regions had no altered deuterium uptake. Strongly disordered regions and regions of low per-residue confidence scores (pLDDT) were omitted for clarity.
