# Supplementary material for: An unconventional gatekeeper mutation sensitizes inositol hexakisphosphate kinases to an allosteric inhibitor
Source: eLife. 2023 Oct 16;12:RP88982. doi: 10.7554/eLife.88982 (PMC10578927; doi:10.7554/eLife.88982)
Supplement: Supplementary file 1. — FMP-201300, highlighted in green, is the most promising compound as it is not displaying any PAINS motifs, has no known inhibitory activities, and is neither redox-active nor cytotoxic. All values are for IP6K1L210V if not otherwise indicated. [file elife-88982-supp1.xlsx]

## Sheet: Tabelle1
FMP identifier	105189	200006	201300
Z-score	-18.2	-18.6	-24.0
%Activity	38.3	37.4	12.5
IC50 (IP6K1L210V)	5.13 µM	4.33 µM	1.60 µM
IC50 (IP6K1wt)	85.3 µM	20.5 µM	17 µM
FMP identifier	405356	710989	711656
Z-score	-14.6	-17.5	-24.6
%Activity	7.8	35.6	21.3
IC50 (IP6K1L210V)	2.86 µM	3.38 µM	1.76 µM
IC50 (IP6K1wt)	12.1 µM	15.8 µM	47.5 µM
