# Supplementary material for: An unconventional gatekeeper mutation sensitizes inositol hexakisphosphate kinases to an allosteric inhibitor
Source: eLife. 2023 Oct 16;12:RP88982. doi: 10.7554/eLife.88982 (PMC10578927; doi:10.7554/eLife.88982)
Supplement: Supplementary file 2. — All compounds were measured in independent triplicates and errors represent standard deviation. Redox activity of selected compounds measured via a photometric surrogate assay. Reactions contained 50 mM HEPES pH 7.5, 50 mM NaCl, 200 mM DTT, and 20 µM resazurin, and were incubated for 1 hr at 37°C. [file elife-88982-supp2.xlsx]

## Sheet: Cytotoxicity
Compound (10 µM)	Cell line	Cell number (%)
105189	HEK293	72.7 ± 9.8
	HepG2	67.4 ± 6.4
200006	HEK293	82.8 ± 9.4
	HepG2	104.1 ± 9.9
201300	HEK293	100.1 ± 4.1
	HepG2	99.1 ± 2.8
405356	HEK293	104.0 ± 1.4
	HepG2	65.9 ± 16.9

## Sheet: Redox activity
Compound	Conversion (%)	Z-score
105189	4.58	3.96
200006	2.76	1.9
201300	-0.0816	-0.225
405356	0.0343	0.674
L. A. Lor, J. Schneck, D. E. Mcnulty, E. Diaz, M. Brandt, S. H. Thrall, B. Schwartz, Journal of biomolecular screening 2007, 12, 881-890.
