# Supplementary material for: An unconventional gatekeeper mutation sensitizes inositol hexakisphosphate kinases to an allosteric inhibitor
Source: eLife. 2023 Oct 16;12:RP88982. doi: 10.7554/eLife.88982 (PMC10578927; doi:10.7554/eLife.88982)
Supplement: Supplementary file 3. [file elife-88982-supp3.xlsx]

## Sheet: Ligation-independent cloning
Primer	Sequence
IP6K1 forward	5’-TACTTCCAATCCAATGCAATGTGTGTGTGTCAAACCATG-3’
IP6K1 reverse	5’-TTATCCACTTCCAATGTTATTATTATTGATTTTCATCGCGCATCTG-3’
IP6K2 forward	5’-TACTTCCAATCCAATGCAATGTCTCCGGCGTTTCGTGCTATG-3’
IP6K2 reverse	5’-TTATCCACTTCCAATGTTATTATTATTCGCCGCTTTCTTC-3’
IP6K3 forward	5’-TACTTCCAATCCAATGCAATGGTCGTTCAAAATTCGGC-3’
IP6K3 reverse	5’-TTATCCACTTCCAATGTTATTATTCGCCTTCTTGGATATCC-3’

## Sheet: Site-directed mutagenesis
Mutant		Primer (5’à 3’)
IP6K1 (L210G)	Forward	CTGCTGGGGGAAAACGTCGTGCATCACTT
	Reverse	GTTTTCCCCCAGCAGAAATTTATACAGCT
IP6K1 (L210A)	Forward	CTGCTGGCGGAAAACGTCGTGCATCACTT
	Reverse	GTTTTCCGCCAGCAGAAATTTATACAGCT
IP6K1 (L210V)	Forward	CTGCTGGTGGAAAACGTCGTGCATCACTT
	Reverse	GTTTTCCACCAGCAGAAATTTATACAGCT
IP6K1 (L210C)	Forward	CTGCTGTGCGAAAACGTCGTGCATCACTT
	Reverse	GTTTTCGCACAGCAGAAATTTATACAGCT
IP6K2 (L206G)	Forward	ATCCTGGGGGAAAACCTGACCTCCCGCTA
	Reverse	GTTTTCCCCCAGGATGAATTTATACTGAT
IP6K2 (L206V)	Forward	ATCCTGGTGGAAAACCTGACCTCCCGCTA
	Reverse	GTTTTCCACCAGGATGAATTTATACTGAT
IP6KA (M85V)	Forward	ATCCGTGTGGAAAACCTGATGTACAAATAC
	Reverse	GTTTTCCACACGGATAAATTCCAGTTCAC
